# Supplementary material
Source: publisher figshare collection journal article supplement (https://tandf.figshare.com/ndownloader/files/8777644)
Supplement: Supplementary file 1 [file 8777644]

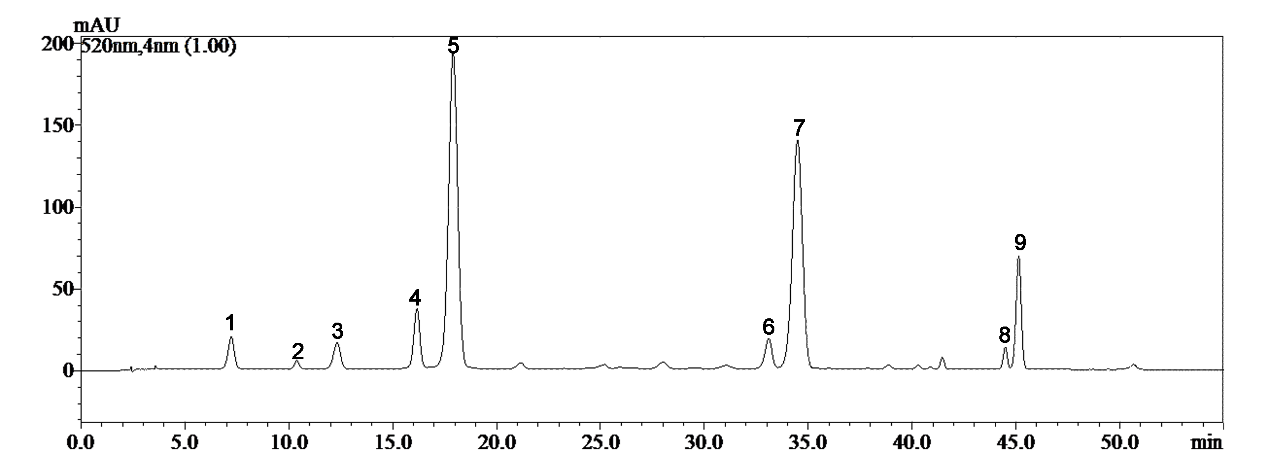


**Figure S1.** Chromatography of Anthocyanins in Grape Skins. Peak Numbers Correspond to the Labeling Adopted in Table S1.

**Table S1.** Characterization of anthocyanin compounds in berry skins using HPLC

| **Peak** | **Retention time (min)** | **Tentative identification** |
| --- | --- | --- |
| 1 | 7.176 | delphinidin-3-O-glucoside |
| 2 | 10.284 | cyanidin-3-O-glucoside |
| 3 | 12.443 | petunidin-3-O-glucoside |
| 4 | 16.101 | peonidin-3-O-glucoside |
| 5 | 17.961 | malvidin-3-O-glucoside |
| 6 | 33.146 | peonidin-3-O-(6-O-acetyl)-glucoside |
| 7 | 34.695 | malvidin-3-O-(6-O-acetyl)-glucoside |
| 8 | 44.481 | peonidin-3-O-(6-O-coumaryl)- glucoside |
| 9 | 45.225 | Malvidin-3-O-(6-O-coumaryl)-glucoside |
